# Supplementary material
Source: Research Square preprint supplement (doi:10.21203/rs.3.rs-9744316/v1)
Supplement: Supplementary file 1 [file 23bbe5375af7935967ee0fa8.docx]

**Supplementary Table S1. Target proteins for multiplex proteomic immunoassay analyses**

| UniProt ID | Assay | Protein Name |
| --- | --- | --- |
| P20783 | NTF3 | Neurotrophin-3 |
| O95760 | IL33 | Interleukin-33 |
| P09038 | FGF2 | Fibroblast growth factor 2 |
| P13500 | CCL2 | C-C motif chemokine 2 |
| P01375 | TNF | Tumor necrosis factor |
| Q16665 | HIF1A | Hypoxia-inducible factor 1-alpha |
| P05231 | IL6 | Interleukin-6 |
| P18564 | ITGB6 | Integrin beta-6 |
| P01583 | IL1A | Interleukin-1 alpha |
| P09238 | MMP10 | Stromelysin-2 |
| P09919 | CSF3 | Granulocyte colony-stimulating factor |
| O15123 | ANGPT2 | angiopoietin 2 |
| P43489 | TNFRSF4 | Tumor necrosis factor receptor superfamily member 4 |
| P01137 | TGFB1 | Transforming growth factor beta-1 |
| P48061 | CXCL12 | Stromal cell-derived factor 1 |
| P35968 | KDR/VEGFR2 | Vascular endothelial growth factor receptor 2 |
| P49763 | PGF | Placental growth factor |
| P22301 | IL10 | Interleukin-10 |
| P10145 | CXCL8 | Interleukin-8 |
| P05113 | IL5 | Interleukin-5 |
| P15692 | VEGFA | Vascular endothelial growth factor A |
| P01584 | IL1B | Interleukin-1 beta |
| P03956 | MMP1 | matrix metalloproteinase-1 |
| P14210 | HGF | Hepatocyte growth factor |
| O43915 | VEGFD | Vascular endothelial growth factor D |
| Q15389 | ANGPT1 | Angiopoietin-1 |
| P04141 | CSF2 | Granulocyte-macrophage colony-stimulating factor |
| Q9NSA1 | FGF21 | Fibroblast growth factor 21 |
| P13236 | CCL4 | C-C motif chemokine 4 |
| P01588 | EPO | Erythropoietin |
